# Supplementary material
Source: publisher site journal article supplement (https://www.kjim.org/upload/media/kjim-2017-141-suppl2.pdf)
Supplement: Supplementary file 1 [file kjim-2017-141-suppl2.pdf]

**Supplementary Table 2. Multivariable-adjusted likelihood to experience more harm from one modality than from the other modality in incident dialysis patients aged less than 60 years**

| Baseline comorbid condition                       | SF (95% CI) <sup>a</sup> | p value |
|---------------------------------------------------|--------------------------|---------|
| More harm from PD as an initial dialysis modality |                          |         |
| Myocardial infarction <sup>b</sup>                | 1.52 (1.00–2.29)         | 0.049   |
| Cerebrovascular disease                           | 1.46 (1.15–1.83)         | 0.001   |
| Diabetes mellitus <sup>b</sup>                    | 1.23 (1.04–1.47)         | 0.018   |
| Congestive heart failure                          | 1.20 (0.97–1.47)         | 0.094   |
| Cancer                                            | 1.09 (0.83–1.44)         | 0.532   |
| Age (per 1-year increase) <sup>c</sup>            | 1.01 (1.00–1.02)         | 0.016   |
| Sex, male (vs. female)                            | 1.01 (0.85–1.20)         | 0.889   |
| More harm from HD as an initial dialysis modality |                          |         |
| MA (vs. NHI) <sup>b</sup>                         | 1.42 (1.17–1.73)         | 0.001   |
| Chronic pulmonary disease                         | 1.08 (0.87–1.35)         | 0.489   |
| Liver disease                                     | 1.02 (0.82–1.28)         | 0.838   |
| Peripheral artery disease                         | 1.01 (0.69–1.47)         | 0.977   |
| Peptic ulcer disease                              | 1.00 (0.79–1.26)         | 0.990   |

SF, synergy factor; CI, confidence interval; PD, peritoneal dialysis; HD, hemodialysis; MA, Medical Aid; NHI, National Health Insurance.

<sup>a</sup>Adjusted SFs and 95% CIs based on a multiplicative interaction between initial dialysis modality and baseline comorbid conditions on mortality.

<sup>b</sup>The pattern of choice for dialysis modality in this condition consequently increased the mortality risk.

<sup>c</sup>The pattern of choice for dialysis modality in this condition consequently conferred the survival benefit.
